# Supplementary material for: PP4 Is Essential for Germinal Center Formation and Class Switch Recombination in Mice
Source: PubMed Central journal article supplement (PMC4162579; doi:10.1371/journal.pone.0107505), 2014-09-12
Supplement: pone.0107505.s001.pdf [file pone.0107505.s001.pdf]

## Supporting figure 1

### A Germline of *Ig* constant (C) regions before class switching

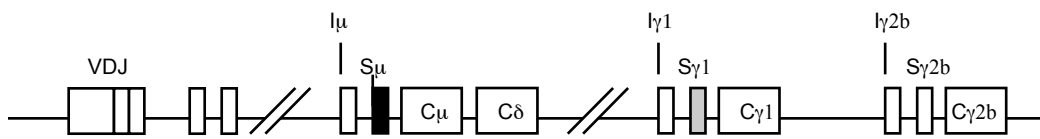

### B Switching to IgG1

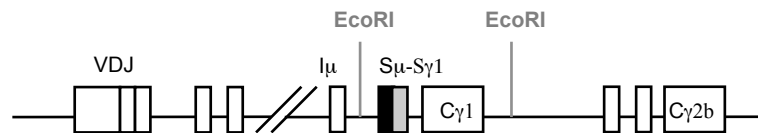

### C Digestion-circularization PCR (DC-PCR) to detect recombined Sμ-Sγ1 sequence

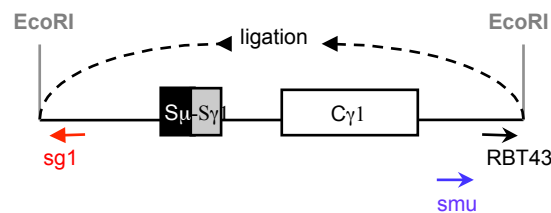

### D PCR product indicating the recombined Sμ-Sγ1 sequence

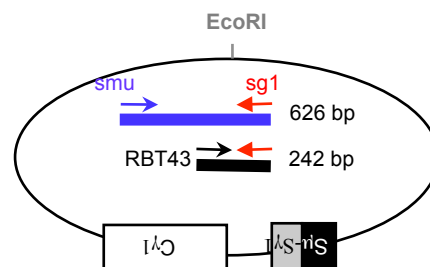

**Schematic illustration of digestion-circularization (DC)-PCR to detect the switched Sμ-Sγ1 sequence.** (A) Schematic illustration of germline structure of *Ig* switch (S) regions and constant (C) regions. (B) Schematic illustration of the switched Sμ-Sγ1 structure. (C, D) For first-round DC-PCR (C), EcoRI-digested and re-ligated circular DNA was used as a template and primers “RBT43” (5'-GAGAGCAGGATCTCCTGGGTAGG-3') and “sg1” (5'-AACAAAGTCACTGTAAATGCTTCGGGTA-3') were employed (94°C 30”, 64°C 30”, 72°C 35” for 15 cycles). For second-round nested PCR, primers “sg1” and “smu” (5'-TAGTTGGGGATTCTAAGCATCACA GA-3') were used (94°C 30”, 61°C 30”, 72°C 20” for 32 cycles). The generation of a PCR product of 242 bp indicated successful Sμ-Sγ1 recombination.
